# Supplementary material
Source: publisher figshare collection journal article supplement (https://acs.figshare.com/ndownloader/files/4712227)
Supplement: Supplementary file 1 [file 4712227]

# Supporting Information of No. jp067745x

## Solvent Effects on Electronic Structures and Chain Conformations of $\alpha$ -Oligothiophenes in Polar and Apolar Solutions

Suci Meng, Jing Ma\*, and Yuansheng Jiang

*Institute of Theoretical and Computational Chemistry, Key Laboratory of Mesoscopic Chemistry of  
MOE, School of Chemistry and Chemical Engineering, Nanjing University, Nanjing, 210093, People's  
Republic of China*

### List of contents:

**Table S1.** Various Charges near the Equilibrium Structures of Thiophene-water and Thiophene-carbon Tetrachloride Dimers

**Table S2.** The Number of Solvents Corresponding to a Solute Molecule. The Concentration of Solution is Assumed to be 0.1 M, and the Density of Solution is Replaced by that of Pure Solvents

**Table S3.** Geometrical Parameters of **2T** and **3T** (Bond Length in Å, Dihedral Angel in Degree) Optimized in Gas Phase, *n*-Hexane, 1,4-Dioxane, Chloroform, and Water, Respectively, at the B3LYP/6-31G (d) Level

**Figure S1.** Evolution of the interaction potentials of C-H...Cl interactions as a function of the intermolecular distance,  $r_{H...Cl}$ . The interaction energy corresponds to the energy difference between the isolated molecules. The structures of dimers were obtained by fixing H...Cl distances at  $r_{H...Cl}$ , and minimizing other variables at MP2/6-31+G(d, p) level.

**Figure S2.** Evolution of the relative energy of (a) S...H-O; (b)  $\pi$ ...H-O; and (c) C-H...Cl interactions with partial charges taken from PCFF, Mulliken, ESP as a function of the intermolecular distance,  $r_{S...H}$ ,  $r_{CEN...}$ , and  $r_{H...Cl}$ , respectively. The interaction energy corresponds to the energy difference between the isolated molecules.

**Figure S3.** Probability of end-to-end distance,  $L$ , (in units of Å) of **nT**s and the representative conformations in *n*-hexane. The data come from the statistical analysis of MD simulations.

**Figure S4.** Probability of end-to-end distance,  $L$ , (in units of Å) of **nT**s and the representative conformations in 1,4-dioxane. The data come from the statistical analysis of MD simulations.

**Figure S5.** Probability of end-to-end distance,  $L$ , (in units of Å) of **nT**s and the representative conformations in carbon tetrachloride. The data come from the statistical analysis of MD simulations.

**Figure S6.** Probability of end-to-end distance,  $L$ , (in units of Å) of **nT**s and the representative conformations in chloroform. The data come from the statistical analysis of MD simulations.

**Figure S7.** Radial distribution functions between the geometric center (CEN) of oligothiophene ring and oxygen (O) in water for: (a) **T** (thiophene); (b) the central ( $g_{mid}(r)$ ) and terminal ( $g_{end}(r)$ ) ring of

**3T**; and (c) the central ( $g_{mid}(r)$ ) and terminal ( $g_{end}(r)$ ) ring of **9T**, respectively. The statistical error is  $\pm 0.05 \text{ \AA}$ .

**Figure S8.** Radial distribution functions:  $g_{H...O}(r)$  for hydrogen (H in thiophene) to oxygen (O in water). The statistical error is  $\pm 0.05 \text{ \AA}$ .

**Table S1.** Various Charges near the Equilibrium Structures of Thiophene-water and Thiophene-carbon

Tetrachloride Dimers

|                                             | PCFF    | Mulliken  | ESP       |
|---------------------------------------------|---------|-----------|-----------|
| S...H-O interaction ( $r_{S...H}=2.4$ Å)    |         |           |           |
| S1                                          | 0.0240  | 0.046088  | 0.085736  |
| C2                                          | -0.1388 | -0.267338 | -0.262202 |
| C3                                          | -0.1388 | -0.267338 | -0.262202 |
| C4                                          | -0.1268 | -0.151514 | -0.056418 |
| C5                                          | -0.1268 | -0.151514 | -0.056418 |
| H6                                          | 0.1268  | 0.204741  | 0.198037  |
| H7                                          | 0.1268  | 0.204741  | 0.198037  |
| H8                                          | 0.1268  | 0.181764  | 0.107059  |
| H9                                          | 0.1268  | 0.181764  | 0.107059  |
| H10                                         | 0.3991  | 0.390378  | 0.386466  |
| O11                                         | -0.7982 | -0.731877 | -0.838754 |
| H12                                         | 0.3991  | 0.360106  | 0.393600  |
| $\pi$ ...H-O interaction ( $r_{CEN}=2.4$ Å) |         |           |           |
| S1                                          | 0.0240  | 0.038044  | 0.048691  |
| C2                                          | -0.1388 | -0.306073 | -0.256728 |
| C3                                          | -0.1388 | -0.307277 | -0.262372 |
| C4                                          | -0.1268 | -0.105456 | -0.051646 |
| C5                                          | -0.1268 | -0.104457 | -0.048959 |
| H6                                          | 0.1268  | 0.203040  | 0.199384  |
| H7                                          | 0.1268  | 0.203040  | 0.201590  |
| H8                                          | 0.1268  | 0.182678  | 0.114512  |
| H9                                          | 0.1268  | 0.182683  | 0.114340  |
| H10                                         | 0.3991  | 0.381398  | 0.359602  |
| O11                                         | -0.7982 | -0.727886 | -0.816188 |
| H12                                         | 0.3991  | 0.360267  | 0.397774  |
| C-H...Cl interaction ( $r_{H...Cl}=2.6$ Å)  |         |           |           |
| S1                                          | 0.024   | -0.092887 | 0.020483  |
| C2                                          | -0.139  | -0.154089 | -0.191063 |
| C3                                          | -0.139  | -0.486272 | -0.234763 |
| C4                                          | -0.127  | -0.199385 | -0.126336 |
| C5                                          | -0.127  | 0.194130  | -0.046229 |
| H6                                          | 0.127   | 0.182119  | 0.172709  |
| H7                                          | 0.127   | 0.190204  | 0.178175  |
| H8                                          | 0.127   | 0.170808  | 0.107451  |
| H9                                          | 0.127   | 0.174045  | 0.114562  |
| Cl10                                        | -0.184  | -0.037102 | 0.029281  |
| C11                                         | 0.736   | -0.125658 | -0.123638 |
| Cl12                                        | -0.184  | 0.193314  | 0.030064  |
| Cl13                                        | -0.184  | -0.004614 | 0.034652  |
| Cl14                                        | -0.184  | -0.004614 | 0.034652  |

**Table S2.** The Number of Solvents Corresponding to a Solute Molecule. The Concentration of Solution is Assumed to be 0.1 M, and the Density of Solution is Replaced by that of Pure Solvents

|     | <i>n</i> -hexane | 1,4-dioxane | carbon tetrachloride | chloroform | water |
|-----|------------------|-------------|----------------------|------------|-------|
| T   |                  | 117         |                      |            | 551   |
| 2T  | 75               | 116         | 102                  | 123        | 546   |
| 3T  | 74               | 115         | 102                  | 123        | 542   |
| 4T  | 73               | 114         | 101                  | 122        | 537   |
| 5T  | 72               | 113         | 101                  | 121        | 533   |
| 6T  | 71               | 112         | 100                  | 120        | 528   |
| 7T  | 70               | 111         | 100                  | 120        | 524   |
| 8T  | 69               | 110         | 99                   | 119        | 519   |
| 9T  | 68               | 109         | 99                   | 118        | 514   |
| 10T | 67               | 108         | 98                   | 118        | 510   |

**Table S3.** Geometrical Parameters of **2T** and **3T** (Bond Length in Å, Dihedral Angel in Degree)  
Optimized in Gas Phase, *n*-Hexane, 1,4-Dioxane, Chloroform, and Water, Respectively, at the B3LYP/6-31G (d) Level

| 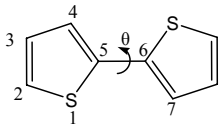 |                           |                  |             |            |       |
|-----------------------------------------------------------------------------------|---------------------------|------------------|-------------|------------|-------|
|                                                                                   | gas (expt. <sup>a</sup> ) | <i>n</i> -hexane | 1,4-dioxane | chloroform | water |
| S1-C2                                                                             | 1.736 (1.719)             | 1.736            | 1.736       | 1.737      | 1.738 |
| C2-C3                                                                             | 1.368 (1.363)             | 1.368            | 1.368       | 1.368      | 1.368 |
| C3-C4                                                                             | 1.424 (1.452)             | 1.425            | 1.425       | 1.425      | 1.426 |
| C4-C5                                                                             | 1.378 (1.370)             | 1.378            | 1.378       | 1.378      | 1.378 |
| C5-S1                                                                             | 1.756 (1.733)             | 1.757            | 1.757       | 1.758      | 1.759 |
| C5-C6                                                                             | 1.451 (1.456)             | 1.451            | 1.451       | 1.452      | 1.452 |
| C2-S1-C5                                                                          | 91.8 ( 91.7)              | 91.8             | 91.8        | 91.8       | 91.8  |
| S1-C2-C3                                                                          | 111.6 (112.3)             | 111.6            | 111.6       | 111.5      | 111.5 |
| C2-C3-C4                                                                          | 112.9 (112.3)             | 112.9            | 112.9       | 113.0      | 113.0 |
| C3-C4-C5                                                                          | 113.6 (111.9)             | 113.6            | 113.6       | 113.6      | 113.6 |
| C4-C5-S1                                                                          | 110.1 (111.8)             | 110.1            | 110.1       | 110.0      | 110.0 |
| C4-C5-C6                                                                          | 129.1 (126.3)             | 129.1            | 129.2       | 129.2      | 129.2 |
| θ                                                                                 | 157.6 (148.4)             | 157.9            | 158.4       | 159.0      | 160.7 |

  

|  |       |                  |             |            |       |
|-------------------------------------------------------------------------------------|-------|------------------|-------------|------------|-------|
|                                                                                     | gas   | <i>n</i> -hexane | 1,4-dioxane | chloroform | water |
| S1-C2                                                                               | 1.735 | 1.736            | 1.736       | 1.737      | 1.737 |
| C2-C3                                                                               | 1.368 | 1.368            | 1.368       | 1.368      | 1.369 |
| C3-C4                                                                               | 1.424 | 1.424            | 1.424       | 1.425      | 1.425 |
| C4-C5                                                                               | 1.379 | 1.379            | 1.379       | 1.380      | 1.380 |
| C5-S1                                                                               | 1.757 | 1.758            | 1.758       | 1.759      | 1.759 |
| C5-C6                                                                               | 1.448 | 1.448            | 1.448       | 1.448      | 1.449 |
| C6-C7                                                                               | 1.379 | 1.379            | 1.379       | 1.379      | 1.380 |
| C7-C8                                                                               | 1.417 | 1.417            | 1.417       | 1.418      | 1.418 |
| C6-S10                                                                              | 1.756 | 1.757            | 1.757       | 1.758      | 1.758 |
| C5-S1-C2                                                                            | 91.8  | 91.8             | 91.8        | 91.8       | 91.8  |
| S1-C2-C3                                                                            | 111.6 | 111.6            | 111.6       | 111.6      | 111.6 |
| C2-C3-C4                                                                            | 112.9 | 112.9            | 112.9       | 113.0      | 113.0 |
| C3-C4-C5                                                                            | 113.6 | 113.6            | 113.6       | 113.6      | 113.6 |
| C4-C5-S1                                                                            | 110.1 | 110.1            | 110.1       | 110.0      | 110.0 |
| C9-S10-C6                                                                           | 92.1  | 92.1             | 92.1        | 92.1       | 92.1  |
| S10-C6-C7                                                                           | 110.1 | 110.1            | 110.1       | 110.1      | 110.1 |
| C4-C5-C6                                                                            | 129.1 | 129.1            | 129.1       | 129.1      | 129.1 |
| θ                                                                                   | 161.4 | 161.4            | 161.5       | 161.7      | 161.9 |

<sup>a</sup> Reference 83.

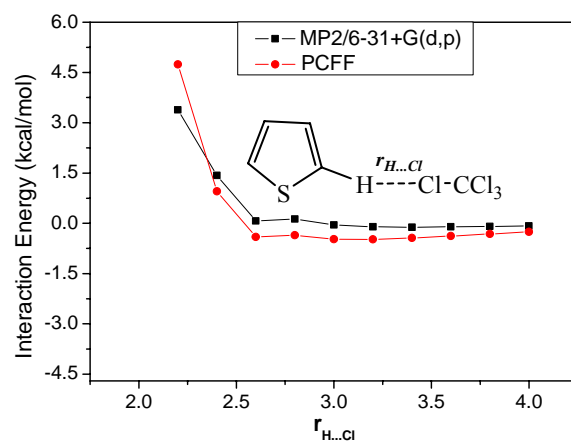

**Figure S1.** Evolution of the interaction potentials of C-H...Cl interactions as a function of the intermolecular distance,  $r_{H...Cl}$ . The interaction energy corresponds to the energy difference between the isolated molecules. The structures of dimers were obtained by fixing H...Cl distances at  $r_{H...Cl}$ , and minimizing other variables at MP2/6-31+G(d, p) level.

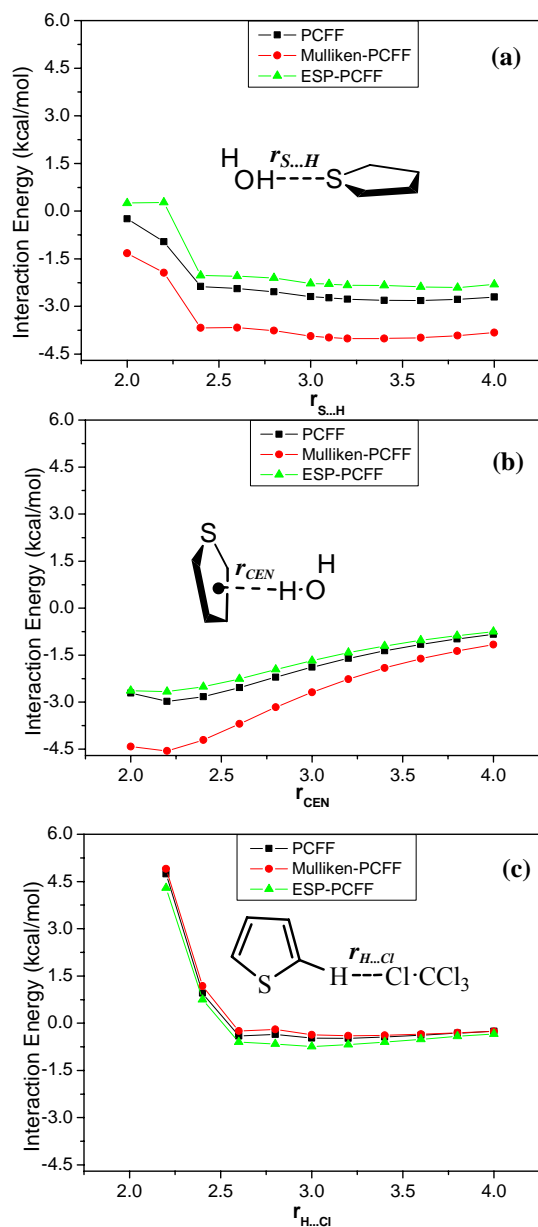

**Figure S2.** Evolution of the relative energy of (a) S...H-O; (b)  $\pi...H-O$ ; and (c) C-H...Cl interactions with partial charges taken from PCFF, Mulliken, ESP as a function of the intermolecular distance,  $r_{S...H}$ ,  $r_{CEN}$ , and  $r_{H...Cl}$ , respectively. The interaction energy corresponds to the energy difference between the isolated molecules.

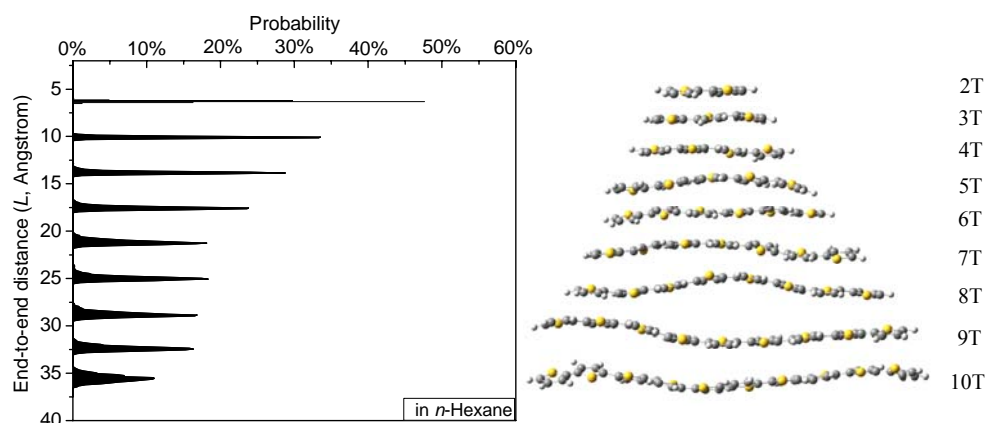

**Figure S3.** Probability of end-to-end distance,  $L$ , (in units of Å) of  $n$ Ts and the representative conformations in  $n$ -hexane. The data come from the statistical analysis of MD simulations.

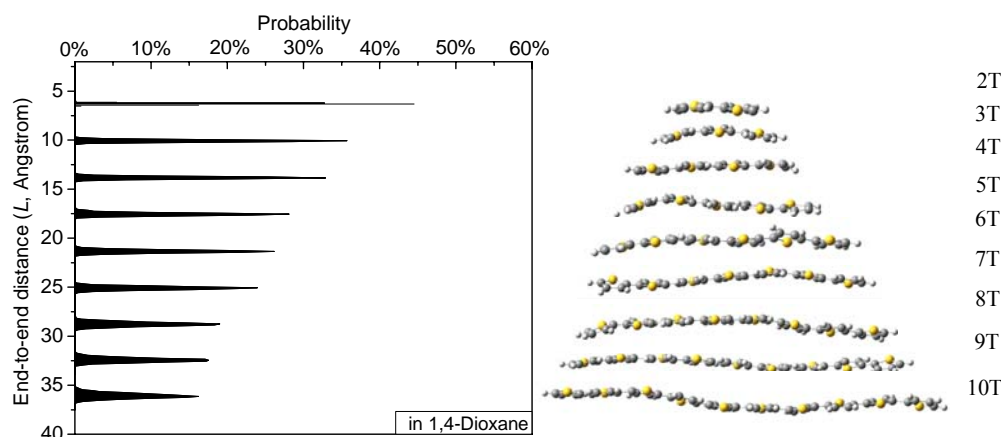

**Figure S4.** Probability of end-to-end distance,  $L$ , (in units of Å) of  $n$ Ts and the representative conformations in 1,4-dioxane. The data come from the statistical analysis of MD simulations.



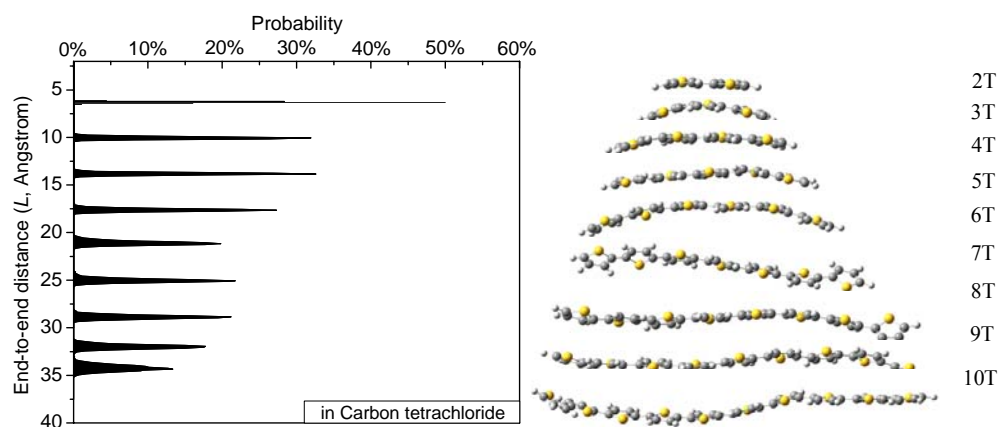

**Figure S5.** Probability of end-to-end distance,  $L$ , (in units of Å) of  $n$ Ts and the representative conformations in carbon tetrachloride. The data come from the statistical analysis of MD simulations.

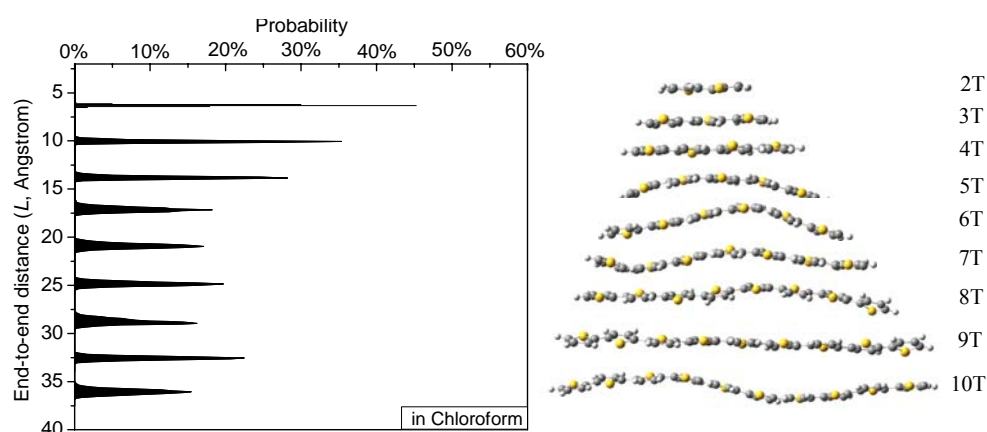

**Figure S6.** Probability of end-to-end distance,  $L$ , (in units of Å) of  $n$ Ts and the representative conformations in chloroform. The data come from the statistical analysis of MD simulations.

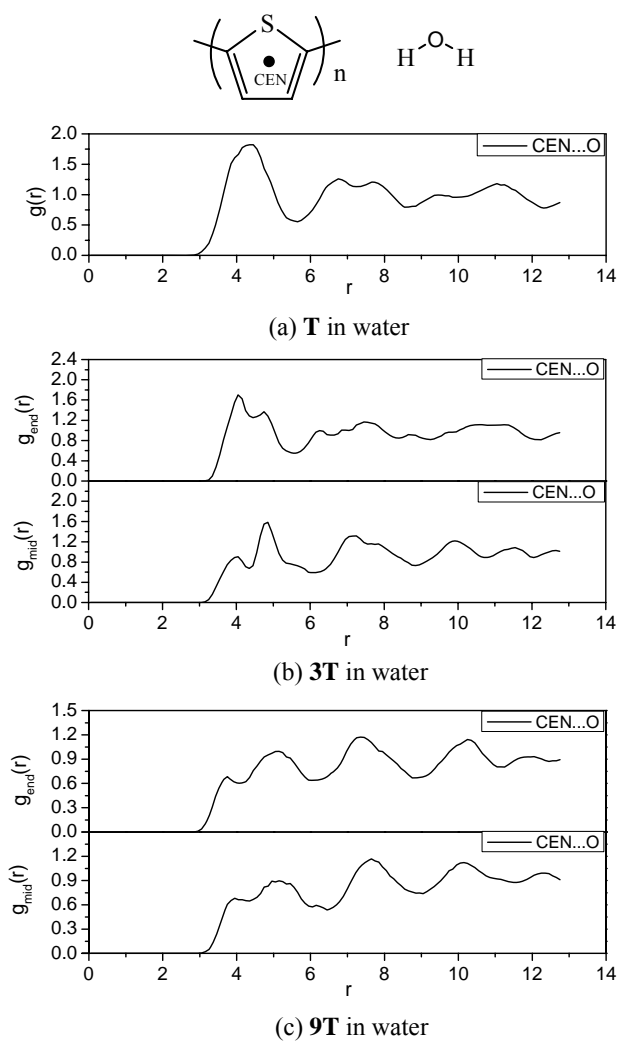

**Figure S7.** Radial distribution functions between the geometric center (CEN) of oligothiophene ring and oxygen (O) in water for: (a) **T** (thiophene); (b) the central ( $g_{mid}(r)$ ) and terminal ( $g_{end}(r)$ ) ring of **3T**; and (c) the central ( $g_{mid}(r)$ ) and terminal ( $g_{end}(r)$ ) ring of **9T**, respectively. The statistical error is  $\pm 0.05 \text{ \AA}$ .

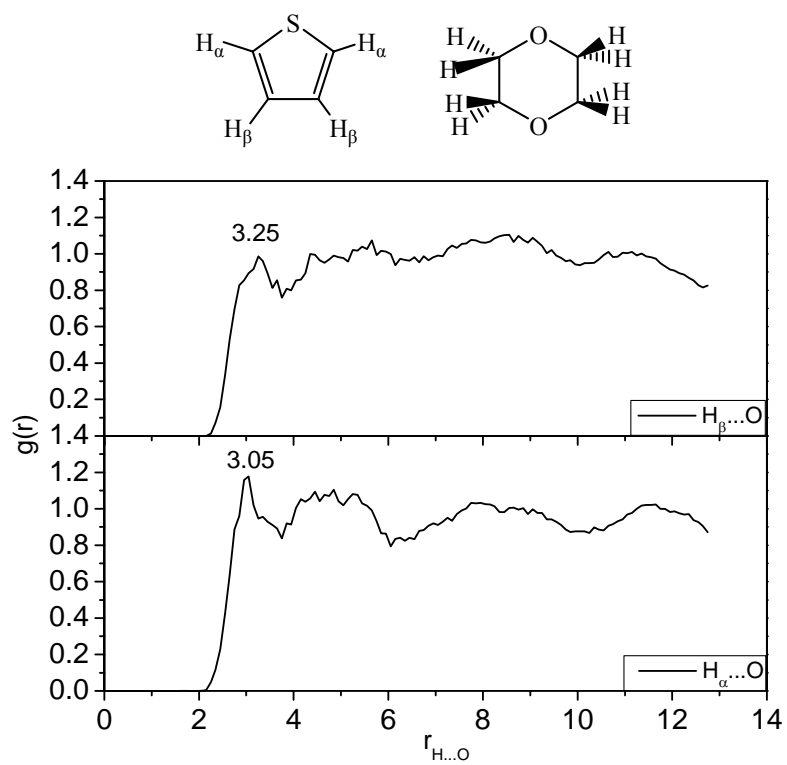

**Figure S8.** Radial distribution functions:  $g_{H...O}(r)$  for hydrogen (H in thiophene) to oxygen (O in water).

The statistical error is  $\pm 0.05 \text{ \AA}$ .
